# Supplementary material for: Syntheses, crystal structures and SHG properties of a series of polar alkali-metal molybdenum(vi) selenites based on strandberg-type [Mo5O15(SeO3)2]4− polyanion
Source: Royal Society of Chemistry journal article supplement (doi:10.1039/c2dt12437h), 2012-01-01
Supplement: c2dt12437h.pdf [file c2dt12437h.pdf]

# Syntheses, Crystal Structures and SHG Properties of a Series of Polar Alkali-metal Molybdenum(VI) Selenites Based on Strandberg-type $[\text{Mo}_5\text{O}_{15}(\text{SeO}_3)_2]^{4-}$ Polyanion

Fang Kong, Chun-Li Hu, Xiang Xu, Tian-Hua Zhou and Jiang-Gao Mao\*

## Supporting Materials

Table S1. The configuration of the Mo and the orientation of the Se—Se vectors to the Mo rings in  $[\text{Mo}_5\text{O}_{15}(\text{SeO}_3)_2]^{4-}$  of different compounds.

Table S2. Direction and magnitude of the  $\text{MoO}_6$  octahedra in the four compounds.

Table S3. Hydrogen bond distances (Å) and angles ( $^\circ$ ) for  $\alpha\text{-Rb}_4\text{Mo}_5\text{O}_{15}(\text{SeO}_3)_2(\text{H}_2\text{O})_2$  **2**.

Table S4. The local dipole moments for the  $\text{SeO}_3$  groups,  $\text{MoO}_6$  octahedra,  $[\text{Mo}_5\text{O}_{15}(\text{SeO}_3)_2]^{4-}$  anions and the net dipole moment within a unit cell for  $\text{HRb}_3(\text{Mo}_5\text{O}_{15})(\text{SeO}_3)_2 \cdot (\text{H}_2\text{O})_2$  **1**,  $\beta\text{-Rb}_4\text{Mo}_5\text{O}_{15}(\text{SeO}_3)_2 \cdot (\text{H}_2\text{O})_2$  **3** and  $\text{K}_4\text{Mo}_5\text{O}_{15}(\text{SeO}_3)_2 \cdot (\text{H}_2\text{O})_2$  **4**.

Figure S1. Simulated and measured XRD powder patterns for  $\text{HRb}_3(\text{Mo}_5\text{O}_{15})(\text{SeO}_3)_2(\text{H}_2\text{O})_2$  **1**,  $\alpha\text{-Rb}_4\text{Mo}_5\text{O}_{15}(\text{SeO}_3)_2(\text{H}_2\text{O})_2$  **2**,  $\beta\text{-Rb}_4\text{Mo}_5\text{O}_{15}(\text{SeO}_3)_2(\text{H}_2\text{O})_2$  **3** and  $\text{K}_4\text{Mo}_5\text{O}_{15}(\text{SeO}_3)_2(\text{H}_2\text{O})_2$  **4**.

Figure S2. DSC curves for  $\beta\text{-Rb}_4\text{Mo}_5\text{O}_{15}(\text{SeO}_3)_2 \cdot (\text{H}_2\text{O})_2$  **3** and  $\text{K}_4\text{Mo}_5\text{O}_{15}(\text{SeO}_3)_2 \cdot (\text{H}_2\text{O})_2$  **4**.

Figure S3. IR spectra for  $\text{HRb}_3(\text{Mo}_5\text{O}_{15})(\text{SeO}_3)_2(\text{H}_2\text{O})_2$  **1**,  $\alpha\text{-Rb}_4\text{Mo}_5\text{O}_{15}(\text{SeO}_3)_2(\text{H}_2\text{O})_2$  **2**,  $\beta\text{-Rb}_4\text{Mo}_5\text{O}_{15}(\text{SeO}_3)_2(\text{H}_2\text{O})_2$  **3** and  $\text{K}_4\text{Mo}_5\text{O}_{15}(\text{SeO}_3)_2(\text{H}_2\text{O})_2$  **4**.

Figure S4. UV-Visible absorption spectra for  $\text{HRb}_3(\text{Mo}_5\text{O}_{15})(\text{SeO}_3)_2 \cdot (\text{H}_2\text{O})_2$  **1**,

$\alpha$ -Rb<sub>4</sub>Mo<sub>5</sub>O<sub>15</sub>(SeO<sub>3</sub>)<sub>2</sub>·(H<sub>2</sub>O)<sub>2</sub> **2**,  $\beta$ -Rb<sub>4</sub>Mo<sub>5</sub>O<sub>15</sub>(SeO<sub>3</sub>)<sub>2</sub>·(H<sub>2</sub>O)<sub>2</sub> **3** and  
K<sub>4</sub>Mo<sub>5</sub>O<sub>15</sub>(SeO<sub>3</sub>)<sub>2</sub>·(H<sub>2</sub>O)<sub>2</sub> **4**.

Figure S5. Optical diffuse reflectance spectra for HRb<sub>3</sub>(Mo<sub>5</sub>O<sub>15</sub>)(SeO<sub>3</sub>)<sub>2</sub>(H<sub>2</sub>O)<sub>2</sub> **1**,  
 $\alpha$ -Rb<sub>4</sub>Mo<sub>5</sub>O<sub>15</sub>(SeO<sub>3</sub>)<sub>2</sub>·(H<sub>2</sub>O)<sub>2</sub> **2**,  $\beta$ -Rb<sub>4</sub>Mo<sub>5</sub>O<sub>15</sub>(SeO<sub>3</sub>)<sub>2</sub>(H<sub>2</sub>O)<sub>2</sub> **3** and  
K<sub>4</sub>Mo<sub>5</sub>O<sub>15</sub>(SeO<sub>3</sub>)<sub>2</sub>(H<sub>2</sub>O)<sub>2</sub> **4**.

Figure S6. View of the structure of polyanion [Mo<sub>5</sub>O<sub>15</sub>(SeO<sub>3</sub>)]<sup>2-</sup> with the macroscopic  
polarity indicated by small green arrows: viewed from above the Mo<sub>5</sub> ring (a) and  
along the C<sub>2</sub> axis in the plane of the Mo<sub>5</sub> ring (b). MoO<sub>6</sub> octahedra are shaded in blue,  
Rb, Se and O atoms are drawn as green, pink and red circles, respectively.

Table S1. The configuration of the Mo and the orientation of the Se—Se vectors to the Mo rings in  $[\text{Mo}_5\text{O}_{15}(\text{SeO}_3)_2]^{4-}$  of different compounds.

| Polyanions                                                                    | Deviation of the Mo5 ring/ $\times \text{Å}$ |       |       |       |       |       | Angles/( $^\circ$ ) |      |
|-------------------------------------------------------------------------------|----------------------------------------------|-------|-------|-------|-------|-------|---------------------|------|
|                                                                               | Mo1                                          | Mo2   | Mo3   | Mo4   | Mo5   | Se1   |                     | Se2  |
| $[\text{Mo}_5\text{O}_{15}(\text{SeO}_3)_2]^{4-}$ in <b>1</b>                 | 0.172                                        | 0.200 | 0.154 | 0.045 | 0.081 | 2.134 | 2.098               | 89.9 |
| $[\text{Mo}_5\text{O}_{15}(\text{SeO}_3)_2]^{4-}$ in <b>2</b>                 | 0.044                                        | 0.191 | 0.101 | 0.170 | 0.217 | 2.129 | 2.130               | 88.6 |
| $[\text{Mo}_5\text{O}_{15}(\text{SeO}_3)_2]^{4-}$ I in <b>3</b>               | 0                                            | 0.173 | 0.261 | 0.173 | 0.261 | 2.114 | 2.114               | 89.6 |
| $[\text{Mo}_5\text{O}_{15}(\text{SeO}_3)_2]^{4-}$ II in <b>3</b>              | 0.154                                        | 0.230 | 0     | 0.154 | 0.230 | 2.125 | 2.125               | 89.2 |
| $[\text{Mo}_5\text{O}_{15}(\text{SeO}_3)_2]^{4-}$ I in <b>4</b>               | 0                                            | 0.167 | 0.252 | 0.167 | 0.252 | 2.111 | 2.111               | 89.5 |
| $[\text{Mo}_5\text{O}_{15}(\text{SeO}_3)_2]^{4-}$ II in <b>4</b>              | 0.149                                        | 0.223 | 0     | 0.149 | 0.223 | 2.120 | 2.120               | 89.9 |
| $[\text{Mo}_5\text{O}_{15}(\text{SeO}_3)_2]^{4-}$ in <b>K<sub>3</sub>Na</b> * | 0.206                                        | 0.179 | 0.048 | 0.166 | 0.091 | 2.109 | 2.132               | 90.0 |

\*K<sub>3</sub>Na is the abbreviation of K<sub>3</sub>NaMo<sub>5</sub>O<sub>15</sub>(SeO<sub>3</sub>)<sub>2</sub>(H<sub>2</sub>O)<sub>2</sub> in reference 12e.

Table S2. Direction and magnitude of the MoO<sub>6</sub> octahedra in the four compounds.

| compound                                                                                                                   | MoO <sub>6</sub> octahedron | distortion direction | $\Delta_d$ |
|----------------------------------------------------------------------------------------------------------------------------|-----------------------------|----------------------|------------|
| HRb <sub>3</sub> (Mo <sub>5</sub> O <sub>15</sub> )(SeO <sub>3</sub> ) <sub>2</sub> (H <sub>2</sub> O) <sub>2</sub>        | Mo(1)O <sub>6</sub>         | C <sub>2</sub>       | 1.49       |
|                                                                                                                            | Mo(2)O <sub>6</sub>         | C <sub>2</sub>       | 1.29       |
|                                                                                                                            | Mo(3)O <sub>6</sub>         | C <sub>2</sub>       | 1.46       |
|                                                                                                                            | Mo(4)O <sub>6</sub>         | C <sub>2</sub>       | 1.37       |
|                                                                                                                            | Mo(5)O <sub>6</sub>         | C <sub>2</sub>       | 1.27       |
| $\alpha$ -Rb <sub>4</sub> Mo <sub>5</sub> O <sub>15</sub> (SeO <sub>3</sub> ) <sub>2</sub> (H <sub>2</sub> O) <sub>2</sub> | Mo(1)O <sub>6</sub>         | C <sub>2</sub>       | 1.19       |
|                                                                                                                            | Mo(2)O <sub>6</sub>         | C <sub>2</sub>       | 1.22       |
|                                                                                                                            | Mo(3)O <sub>6</sub>         | C <sub>2</sub>       | 1.24       |
|                                                                                                                            | Mo(4)O <sub>6</sub>         | C <sub>2</sub>       | 1.20       |
|                                                                                                                            | Mo(5)O <sub>6</sub>         | C <sub>2</sub>       | 1.24       |
| $\beta$ -Rb <sub>4</sub> Mo <sub>5</sub> O <sub>15</sub> (SeO <sub>3</sub> ) <sub>2</sub> (H <sub>2</sub> O) <sub>2</sub>  | Mo(1)O <sub>6</sub>         | C <sub>2</sub>       | 1.29       |
|                                                                                                                            | Mo(2)O <sub>6</sub>         | C <sub>2</sub>       | 1.15       |
|                                                                                                                            | Mo(3)O <sub>6</sub>         | C <sub>2</sub>       | 1.20       |
|                                                                                                                            | Mo(4)O <sub>6</sub>         | C <sub>2</sub>       | 1.19       |
|                                                                                                                            | Mo(5)O <sub>6</sub>         | C <sub>2</sub>       | 1.26       |
|                                                                                                                            | Mo(6)O <sub>6</sub>         | C <sub>2</sub>       | 1.25       |
| K <sub>4</sub> Mo <sub>5</sub> O <sub>15</sub> (SeO <sub>3</sub> ) <sub>2</sub> (H <sub>2</sub> O) <sub>2</sub>            | Mo(1)O <sub>6</sub>         | C <sub>2</sub>       | 1.33       |
|                                                                                                                            | Mo(2)O <sub>6</sub>         | C <sub>2</sub>       | 1.17       |
|                                                                                                                            | Mo(3)O <sub>6</sub>         | C <sub>2</sub>       | 1.21       |
|                                                                                                                            | Mo(4)O <sub>6</sub>         | C <sub>2</sub>       | 1.21       |
|                                                                                                                            | Mo(5)O <sub>6</sub>         | C <sub>2</sub>       | 1.25       |
|                                                                                                                            | Mo(6)O <sub>6</sub>         | C <sub>2</sub>       | 1.28       |

Table S3. Hydrogen bond distances (Å) and angles (°) for  $\alpha$ -Rb<sub>4</sub>Mo<sub>5</sub>O<sub>15</sub>(SeO<sub>3</sub>)<sub>2</sub>(H<sub>2</sub>O)<sub>2</sub> **2**.

| D-H...A                                                                                                                              | d(D-H) | d(H...A) | d(D...A) | <(DHA) |
|--------------------------------------------------------------------------------------------------------------------------------------|--------|----------|----------|--------|
| $\alpha$ -Rb <sub>4</sub> Mo <sub>5</sub> O <sub>15</sub> (SeO <sub>3</sub> ) <sub>2</sub> ·(H <sub>2</sub> O) <sub>2</sub> <b>2</b> |        |          |          |        |
| O(1W)-H(1WA)...O(19)#1                                                                                                               | 0.85   | 2.16     | 2.872(5) | 141.7  |
| O(1W)-H(1WB)...O(1)#2                                                                                                                | 0.85   | 2.29     | 2.851(5) | 124.0  |

Symmetry transformations used to generate equivalent atoms:

$\alpha$ -Rb<sub>4</sub>Mo<sub>5</sub>O<sub>15</sub>(SeO<sub>3</sub>)<sub>2</sub>(H<sub>2</sub>O)<sub>2</sub>: #1  $x+1/2, -y+1/2, z+1/2$ ; #2  $x, y, z-1$ .

Table S4. The local dipole moments for the  $\text{SeO}_3$  groups,  $\text{MoO}_6$  octahedra,  $[\text{Mo}_5\text{O}_{15}(\text{SeO}_3)_2]^{4-}$  anions and the net dipole moment within a unit cell for  $\text{HRb}_3(\text{Mo}_5\text{O}_{15})(\text{SeO}_3)_2 \cdot (\text{H}_2\text{O})_2$  **1**,  $\beta\text{-Rb}_4\text{Mo}_5\text{O}_{15}(\text{SeO}_3)_2 \cdot (\text{H}_2\text{O})_2$  **3** and  $\text{K}_4\text{Mo}_5\text{O}_{15}(\text{SeO}_3)_2 \cdot (\text{H}_2\text{O})_2$  **4**.

| $\text{HRb}_3(\text{Mo}_5\text{O}_{15})(\text{SeO}_3)_2 \cdot (\text{H}_2\text{O})_2$ <b>1</b>    |                   |             |             |             |
|---------------------------------------------------------------------------------------------------|-------------------|-------------|-------------|-------------|
| Polar unit                                                                                        | Dipole moment (D) |             |             |             |
|                                                                                                   | total magnitude   | x-component | y-component | z-component |
| Se(1) $\text{O}_3$                                                                                | 8.79              | 7.91        | 0.55        | 3.80        |
| Se(2) $\text{O}_3$                                                                                | 8.75              | 8.61        | 0.70        | 1.40        |
| Mo(1) $\text{O}_6$                                                                                | 7.53              | 2.60        | 3.60        | 6.09        |
| Mo(2) $\text{O}_6$                                                                                | 5.12              | 1.79        | 2.67        | 3.98        |
| Mo(3) $\text{O}_6$                                                                                | 6.69              | 2.38        | 6.25        | 0.21        |
| Mo(4) $\text{O}_6$                                                                                | 5.55              | 1.36        | 1.45        | 5.19        |
| Mo(5) $\text{O}_6$                                                                                | 5.31              | 1.53        | 2.93        | 4.16        |
| $[\text{Mo}_5\text{O}_{15}(\text{SeO}_3)]^{2-}$                                                   | 11.64             | -9.30       | 5.14        | -4.74       |
| $[\text{Mo}_5\text{O}_{15}(\text{SeO}_3)_2]^{4-}$                                                 | 7.62              | -0.69       | 4.44        | -6.15       |
| $[\text{Mo}_5\text{O}_{15}(\text{SeO}_3)_2]^{4-}$                                                 | 7.62              | 0.69        | 4.44        | -6.15       |
| $[\text{Mo}_5\text{O}_{15}(\text{SeO}_3)_2]^{4-}$                                                 | 7.62              | 0.69        | -4.44       | -6.15       |
| $[\text{Mo}_5\text{O}_{15}(\text{SeO}_3)_2]^{4-}$                                                 | 7.62              | -0.69       | -4.44       | -6.15       |
| Net dipole moment (a unit cell)                                                                   | 24.60             | 0           | 0           | 24.60       |
| $\beta\text{-Rb}_4\text{Mo}_5\text{O}_{15}(\text{SeO}_3)_2 \cdot (\text{H}_2\text{O})_2$ <b>3</b> |                   |             |             |             |
| Polar unit                                                                                        | Dipole moment (D) |             |             |             |
|                                                                                                   | total magnitude   | x-component | y-component | z-component |
| Se(1) $\text{O}_3$                                                                                | 8.55              | 0.97        | 2.97        | 7.96        |
| Se(2) $\text{O}_3$                                                                                | 8.66              | 0.21        | 3.23        | 8.03        |
| Mo(1) $\text{O}_6$                                                                                | 6.24              | 0           | 6.24        | 0           |
| Mo(2) $\text{O}_6$                                                                                | 5.42              | 4.29        | 1.31        | 3.04        |
| Mo(3) $\text{O}_6$                                                                                | 5.12              | 0.56        | 4.71        | 1.93        |
| Mo(4) $\text{O}_6$                                                                                | 5.06              | 0.31        | 4.67        | 1.90        |
| Mo(5) $\text{O}_6$                                                                                | 5.94              | 5.06        | 1.98        | 2.40        |
| Mo(6) $\text{O}_6$                                                                                | 6.59              | 0           | 6.59        | 0           |
| $[\text{Mo}_5\text{O}_{15}(\text{SeO}_3)]^{2-}$                                                   | 8.28              | -0.21       | 2.024       | -8.03       |
| $[\text{Mo}_5\text{O}_{15}(\text{SeO}_3)]^{2-}$                                                   | 8.77              | -0.97       | -3.54       | 7.96        |
| $[\text{Mo}_5\text{O}_{15}(\text{SeO}_3)_2]^{4-}$                                                 | 6.52              | 0           | -6.52       | 0           |
| $[\text{Mo}_5\text{O}_{15}(\text{SeO}_3)_2]^{4-}$                                                 | 6.52              | 0           | -6.52       | 0           |
| $[\text{Mo}_5\text{O}_{15}(\text{SeO}_3)_2]^{4-}$                                                 | 5.25              | 0           | 5.25        | 0           |
| $[\text{Mo}_5\text{O}_{15}(\text{SeO}_3)_2]^{4-}$                                                 | 5.25              | 0           | 5.25        | 0           |
| Net dipole moment (a unit cell)                                                                   | 2.53              | 0           | -2.53       | 0           |
| $\text{K}_4\text{Mo}_5\text{O}_{15}(\text{SeO}_3)_2 \cdot (\text{H}_2\text{O})_2$ <b>4</b>        |                   |             |             |             |
| Polar unit                                                                                        | Dipole moment (D) |             |             |             |
|                                                                                                   | total magnitude   | x-component | y-component | z-component |
| Se(1) $\text{O}_3$                                                                                | 8.55              | 0.23        | 3.23        | 7.96        |
| Se(2) $\text{O}_3$                                                                                | 8.25              | 0.89        | 2.90        | 7.67        |
| Mo(1) $\text{O}_6$                                                                                | 6.20              | 0           | 6.20        | 0           |
| Mo(2) $\text{O}_6$                                                                                | 5.44              | 4.40        | 1.21        | 2.96        |
| Mo(3) $\text{O}_6$                                                                                | 5.34              | 0.84        | 4.85        | 2.07        |
| Mo(4) $\text{O}_6$                                                                                | 6.48              | 0           | 6.48        | 0           |
| Mo(5) $\text{O}_6$                                                                                | 5.92              | 5.20        | 1.72        | 2.26        |
| Mo(6) $\text{O}_6$                                                                                | 5.08              | 0.52        | 4.46        | 2.37        |
| $[\text{Mo}_5\text{O}_{15}(\text{SeO}_3)]^{2-}$                                                   | 8.23              | -0.23       | 2.24        | -7.92       |
| $[\text{Mo}_5\text{O}_{15}(\text{SeO}_3)]^{2-}$                                                   | 8.70              | 0.89        | -4.00       | -7.67       |
| $[\text{Mo}_5\text{O}_{15}(\text{SeO}_3)_2]^{4-}$                                                 | 5.47              | 0           | 5.47        | 0           |
| $[\text{Mo}_5\text{O}_{15}(\text{SeO}_3)_2]^{4-}$                                                 | 5.47              | 0           | 5.47        | 0           |
| $[\text{Mo}_5\text{O}_{15}(\text{SeO}_3)_2]^{4-}$                                                 | 6.90              | 0           | -6.90       | 0           |
| $[\text{Mo}_5\text{O}_{15}(\text{SeO}_3)_2]^{4-}$                                                 | 6.90              | 0           | -6.90       | 0           |
| Net dipole moment (a unit cell)                                                                   | 2.87              | 0           | -2.87       | 0           |

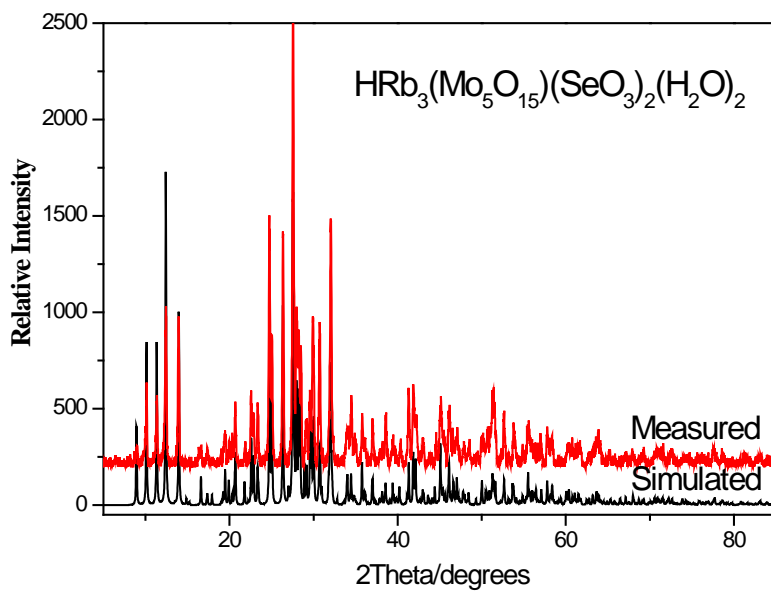

(a)

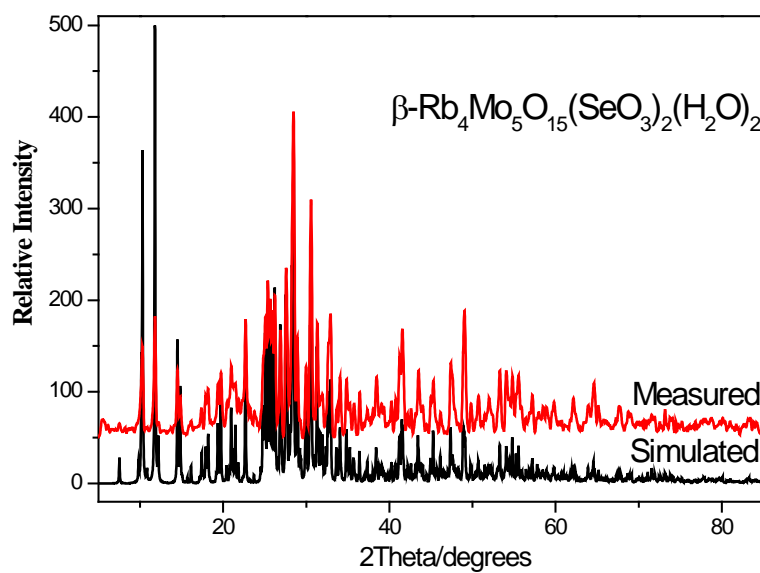

(b)

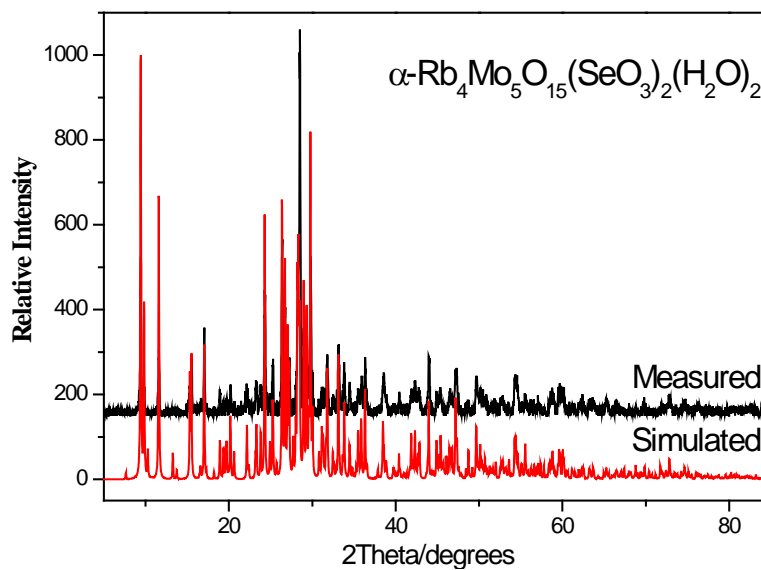

(c)

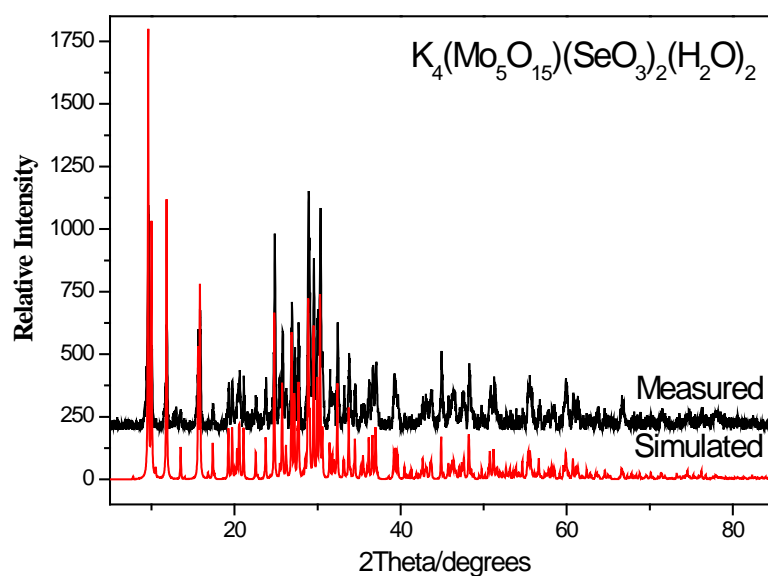

(d)

Figure S1. Simulated and measured XRD powder patterns for  $HRb_3(Mo_5O_{15})(SeO_3)_2(H_2O)_2$  **1**,  $\alpha-Rb_4Mo_5O_{15}(SeO_3)_2(H_2O)_2$  **2**,  $\beta-Rb_4Mo_5O_{15}(SeO_3)_2(H_2O)_2$  **3** and  $K_4Mo_5O_{15}(SeO_3)_2(H_2O)_2$  **4**.

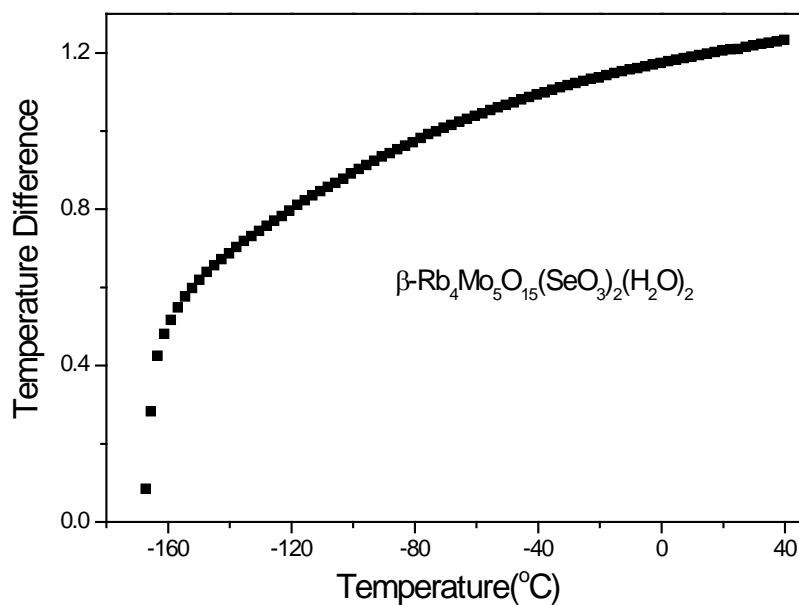

(a)

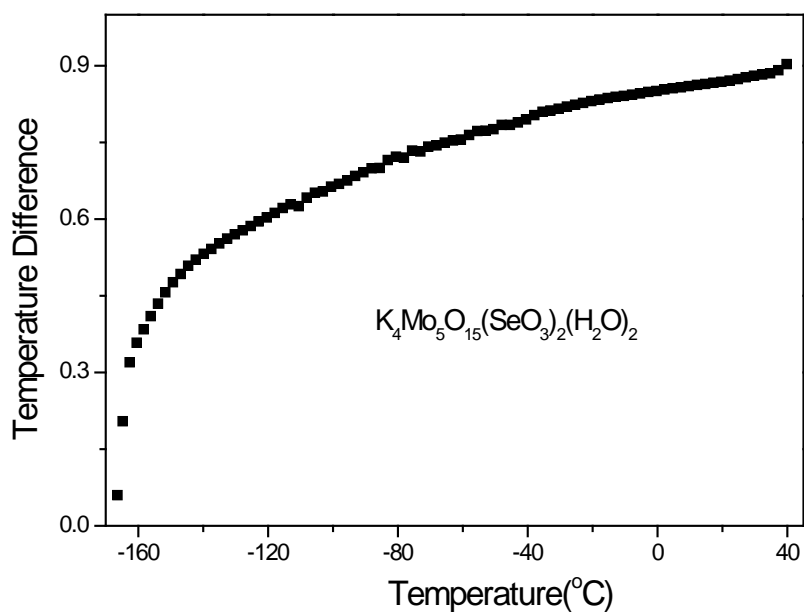

(b)

Figure S2. DSC curves for  $\beta$ - $Rb_4Mo_5O_{15}(SeO_3)_2 \cdot (H_2O)_2$  **3** and  $K_4Mo_5O_{15}(SeO_3)_2 \cdot (H_2O)_2$  **4**.

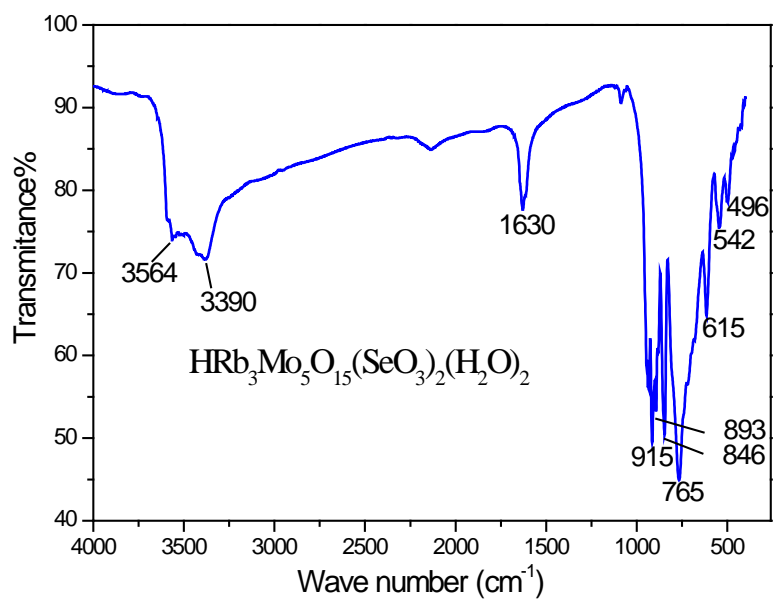

(a)



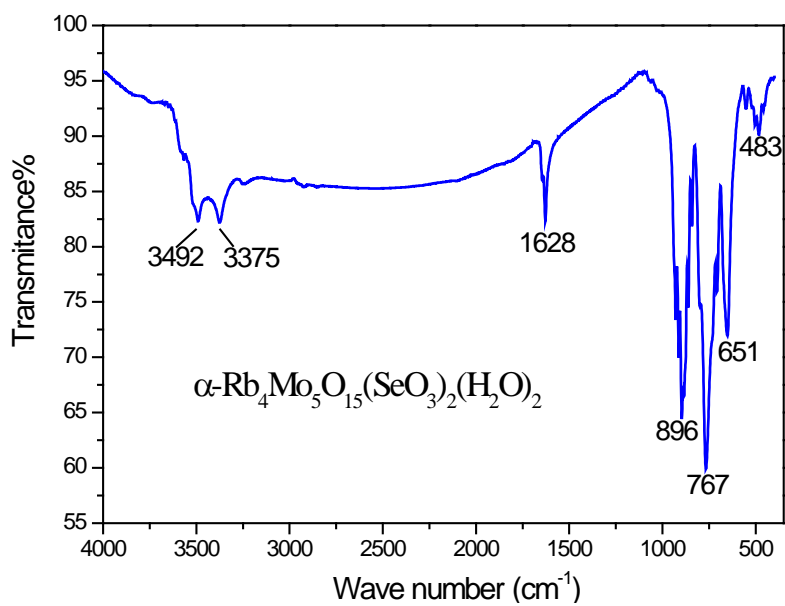

(b)

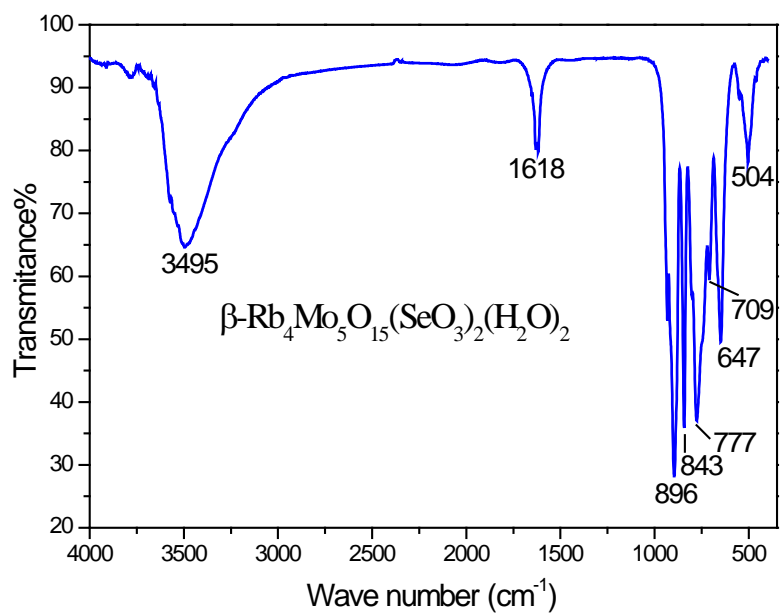

(c)

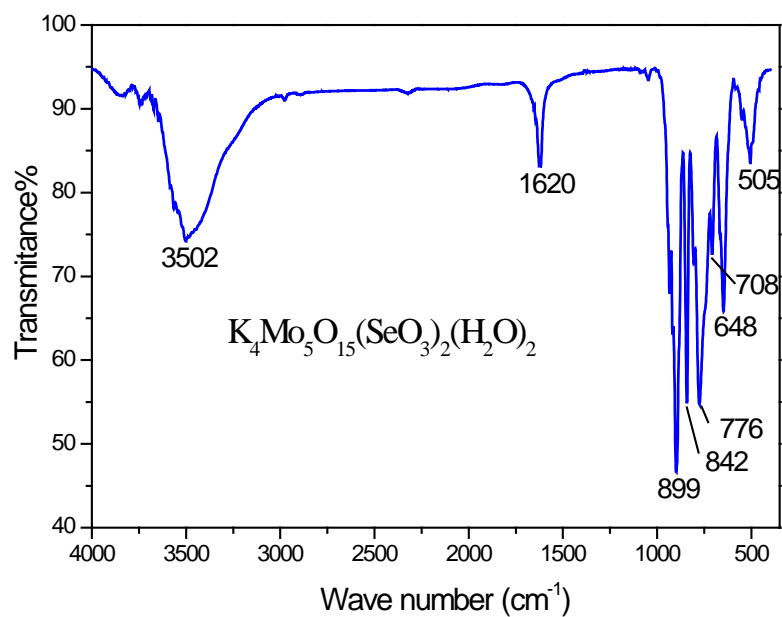

(d)

Figure S3. IR spectra for  $\text{HRb}_3(\text{Mo}_5\text{O}_{15})(\text{SeO}_3)_2(\text{H}_2\text{O})_2$  **1**,  $\alpha\text{-Rb}_4\text{Mo}_5\text{O}_{15}(\text{SeO}_3)_2(\text{H}_2\text{O})_2$  **2**,  $\beta\text{-Rb}_4\text{Mo}_5\text{O}_{15}(\text{SeO}_3)_2(\text{H}_2\text{O})_2$  **3** and  $\text{K}_4\text{Mo}_5\text{O}_{15}(\text{SeO}_3)_2(\text{H}_2\text{O})_2$  **4**.

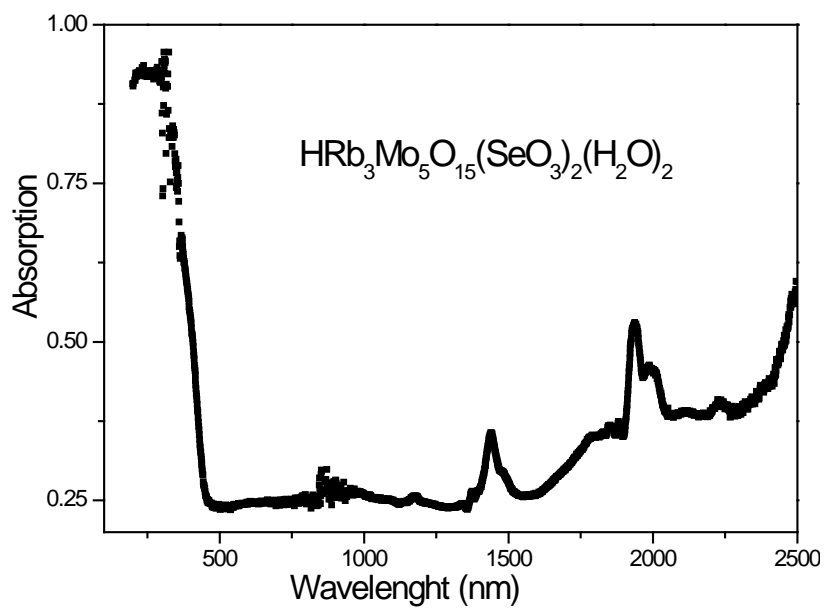

(a)

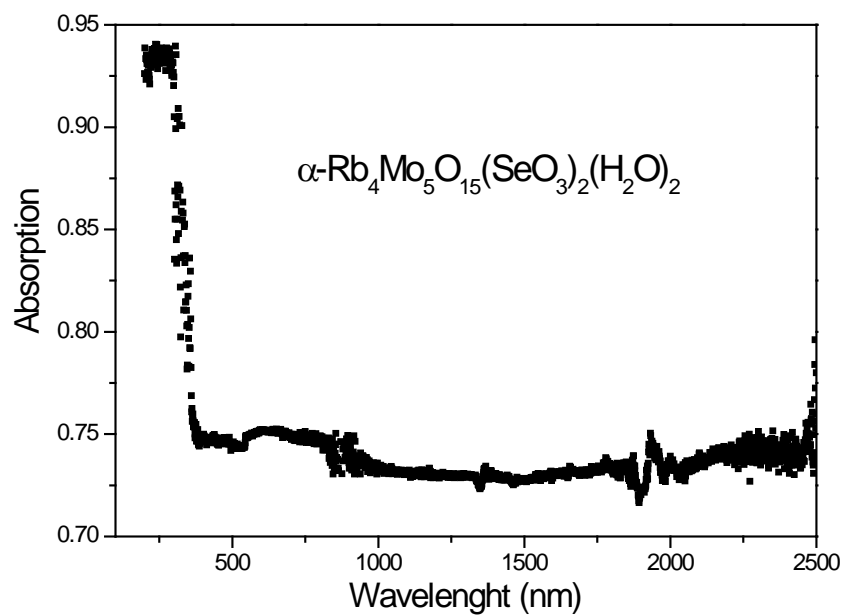

(b)

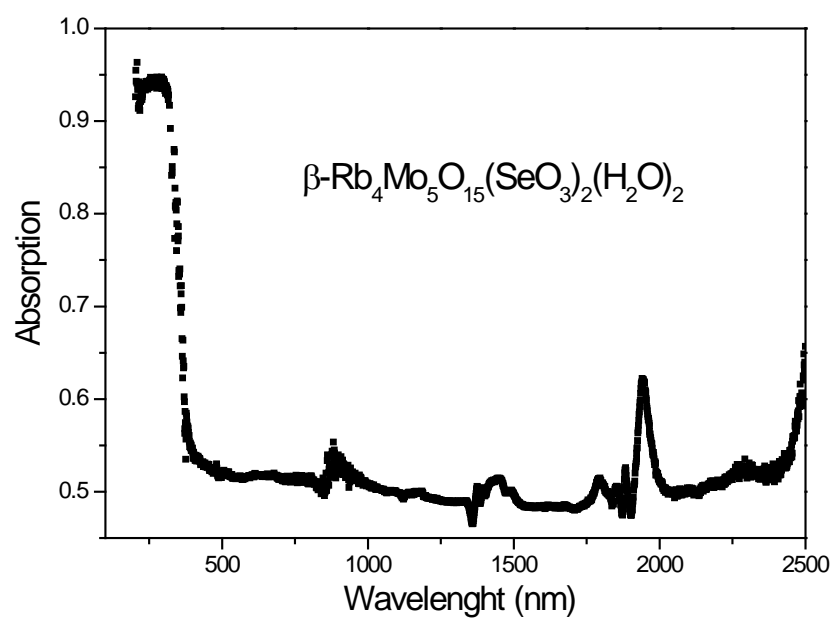

(c)

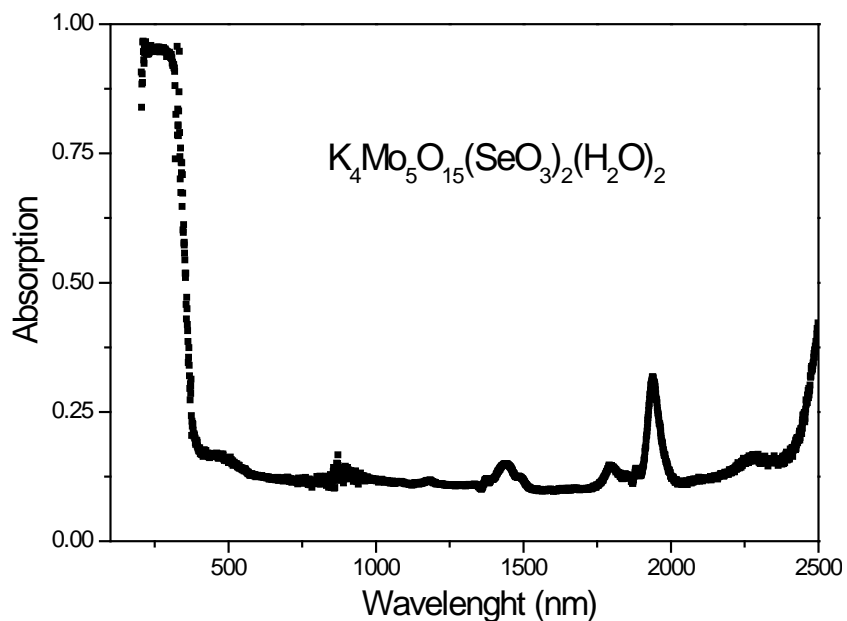

(d)

Figure S4. UV-Visible absorption spectra for  $\text{HRb}_3(\text{Mo}_5\text{O}_{15})(\text{SeO}_3)_2 \cdot (\text{H}_2\text{O})_2$  **1**,  $\alpha\text{-Rb}_4\text{Mo}_5\text{O}_{15}(\text{SeO}_3)_2 \cdot (\text{H}_2\text{O})_2$  **2**,  $\beta\text{-Rb}_4\text{Mo}_5\text{O}_{15}(\text{SeO}_3)_2 \cdot (\text{H}_2\text{O})_2$  **3** and  $\text{K}_4\text{Mo}_5\text{O}_{15}(\text{SeO}_3)_2 \cdot (\text{H}_2\text{O})_2$  **4**.

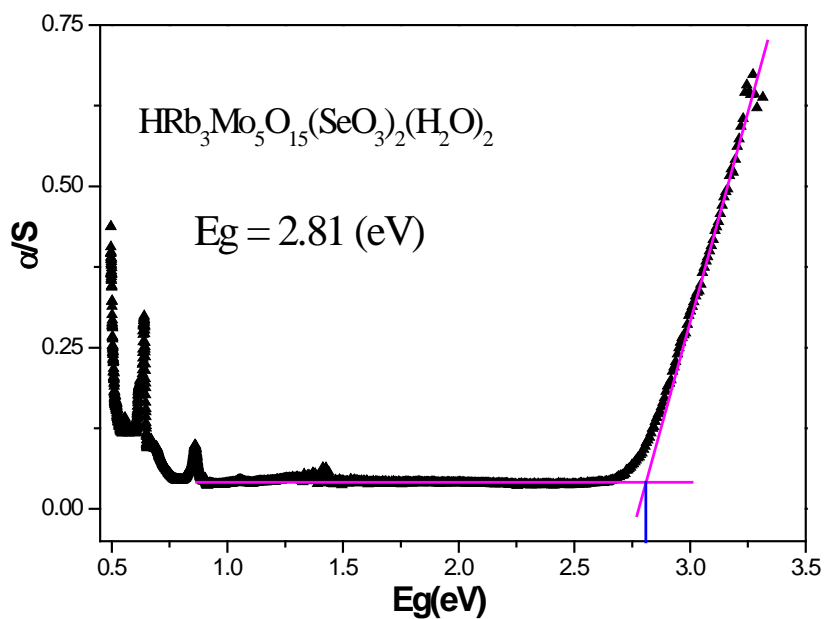

(a)

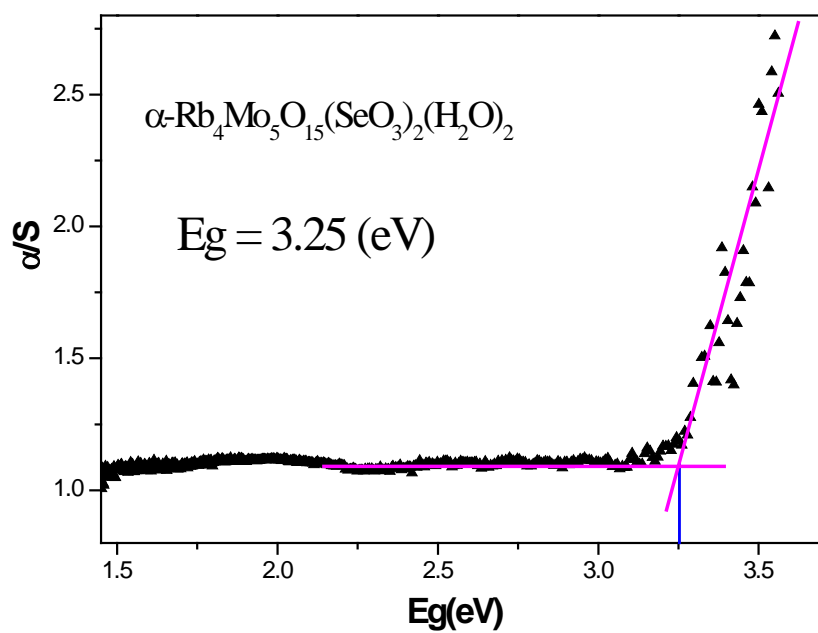

(b)

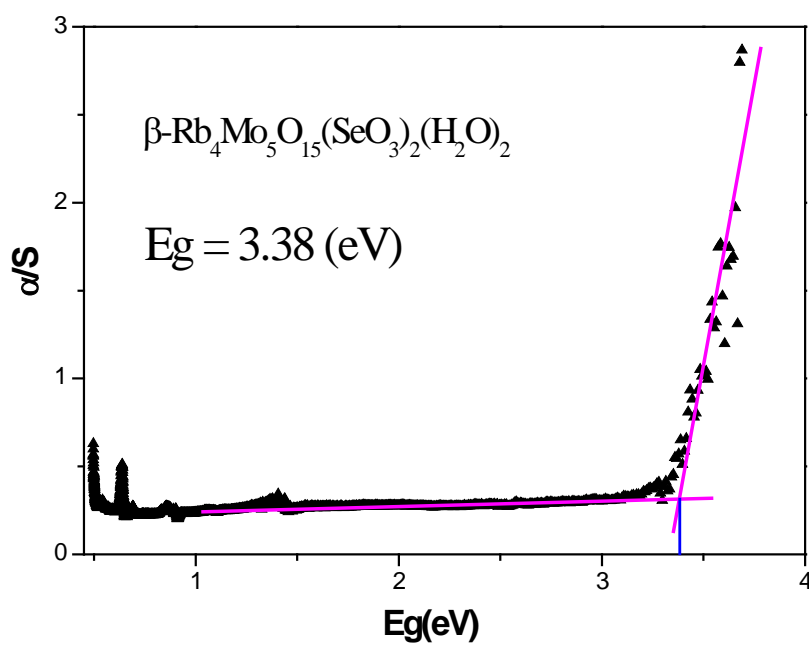

(c)

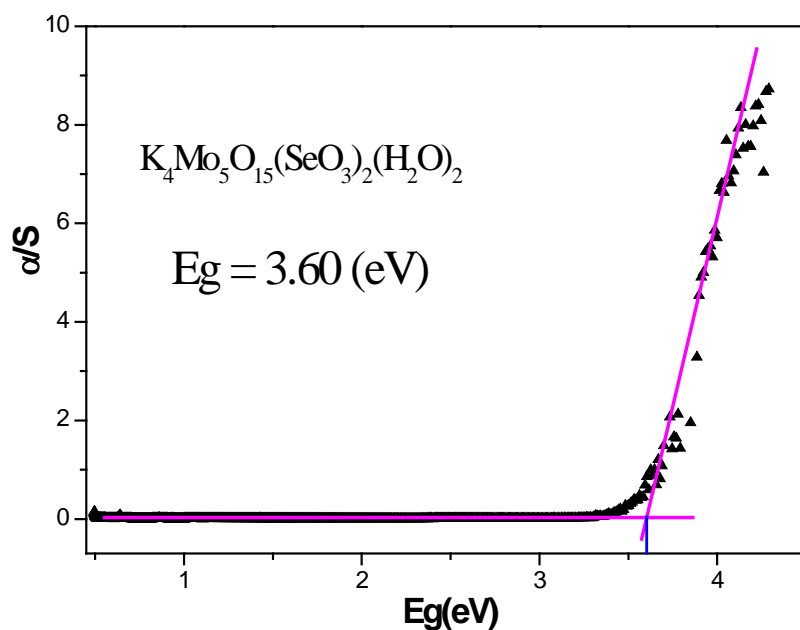

(d)

Figure S5. Optical diffuse reflectance spectra for  $HRb_3(Mo_5O_{15})(SeO_3)_2(H_2O)_2$  **1**,  $\alpha\text{-}Rb_4Mo_5O_{15}(SeO_3)_2 \cdot (H_2O)_2$  **2**,  $\beta\text{-}Rb_4Mo_5O_{15}(SeO_3)_2(H_2O)_2$  **3** and  $K_4Mo_5O_{15}(SeO_3)_2(H_2O)_2$  **4**.

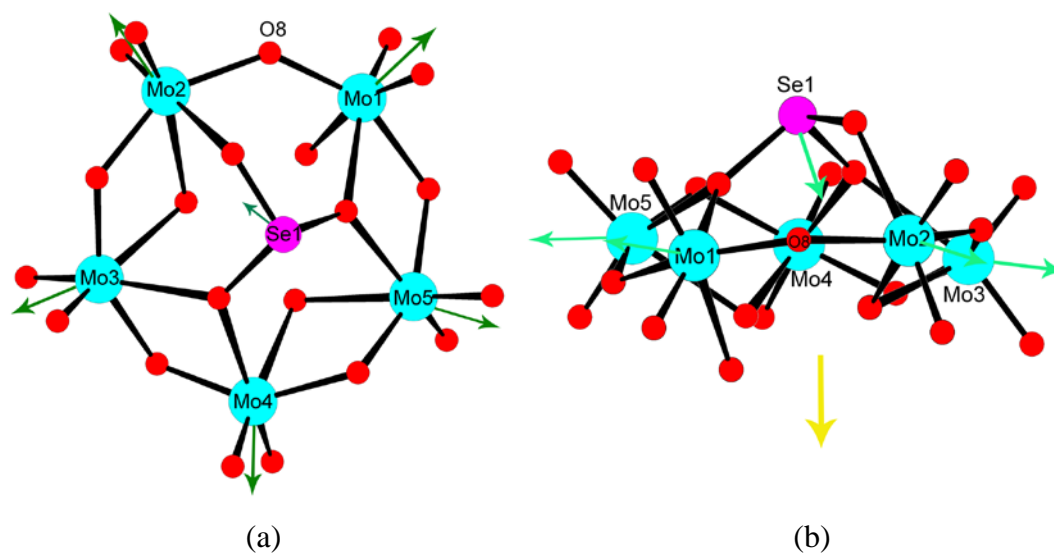

Figure S6. View of the structure of polyanion  $[Mo_5O_{15}(SeO_3)]^{2-}$  with the macroscopic polarity indicated by small green arrows: viewed from above the  $Mo_5$  ring (a) and along the  $C_2$  axis in the plane of the  $Mo_5$  ring (b).  $MoO_6$  octahedra are shaded in blue, Rb, Se and O atoms are drawn as green, pink and red circles, respectively.
